# Supplementary material for: Knowledge and awareness of hepatitis B among households in Malaysia: a community-based cross-sectional survey
Source: Springer Nature journal article supplement (doi:10.1186/s12889-018-6375-8), 2019-01-10
Supplement: MOESM2 [file 12889_2018_6375_MOESM2_ESM.pdf]

## Demographic data

1. Age :  Years

2. Gender

Male

Female

3. Race

Malay

Chinese

Indian

Others: \_\_\_\_\_

4. Marital status

Single

Married

Divorced

Widow/Widower

5. Occupation

Public sector

Private sector

S Self-employed

Student

Retired

Unemployment

Others: \_\_\_\_\_

6. Educational attainment

Never been to school

Primary school

Secondary school

Diploma/certificate

Undergraduate

Post graduate

7. Household monthly income:  RM

## Knowledge of Hepatitis B

| No | Question                                                                                 | Yes                      | No                       |
|----|------------------------------------------------------------------------------------------|--------------------------|--------------------------|
| 1  | Hepatitis B infection is caused by a virus                                               | <input type="checkbox"/> | <input type="checkbox"/> |
| 2  | The brain can be affected by Hepatitis B infection                                       | <input type="checkbox"/> | <input type="checkbox"/> |
| 3  | The heart can be affected by Hepatitis B infection                                       | <input type="checkbox"/> | <input type="checkbox"/> |
| 4  | Kidneys are affected by Hepatitis B infection                                            | <input type="checkbox"/> | <input type="checkbox"/> |
| 5  | Hepatitis B can be transmitted through food or drink                                     | <input type="checkbox"/> | <input type="checkbox"/> |
| 6  | Hepatitis B can be transmitted through blood                                             | <input type="checkbox"/> | <input type="checkbox"/> |
| 7  | Hepatitis B can be transmitted through tattoos                                           | <input type="checkbox"/> | <input type="checkbox"/> |
| 8  | Hepatitis B can be transmitted through sex                                               | <input type="checkbox"/> | <input type="checkbox"/> |
| 9  | Hepatitis B can be transmitted through sharing needles                                   | <input type="checkbox"/> | <input type="checkbox"/> |
| 10 | Hepatitis B can be spread through infected mother to infant hepatitis B during pregnancy | <input type="checkbox"/> | <input type="checkbox"/> |
| 11 | Hepatitis B can be spread by shaking hands with an infected person                       | <input type="checkbox"/> | <input type="checkbox"/> |
| 12 | Hepatitis B infection can be prevented with a vaccine against hepatitis B                | <input type="checkbox"/> | <input type="checkbox"/> |
| 13 | Hepatitis B infection can be prevented with exercise                                     | <input type="checkbox"/> | <input type="checkbox"/> |
| 14 | Hepatitis B infection can be prevented with a balanced diet                              | <input type="checkbox"/> | <input type="checkbox"/> |
| 15 | Hepatitis B infection can be prevented with good hand hygiene                            | <input type="checkbox"/> | <input type="checkbox"/> |
| 16 | There is a blood test to detect Hepatitis B infection                                    | <input type="checkbox"/> | <input type="checkbox"/> |
| 17 | There are antiviral therapy for hepatitis B                                              | <input type="checkbox"/> | <input type="checkbox"/> |
| 18 | Hepatitis B is a risk factor for liver cancer                                            | <input type="checkbox"/> | <input type="checkbox"/> |
| 19 | Hepatitis B infection can be transmitted to your partner                                 | <input type="checkbox"/> | <input type="checkbox"/> |
| 20 | The Malaysian Government provides free Hepatitis B vaccine to newborns                   | <input type="checkbox"/> | <input type="checkbox"/> |
| 21 | A complete set of Hepatitis B vaccine requires three injections of vaccines              | <input type="checkbox"/> | <input type="checkbox"/> |
| 22 | Jaundice is one of the most common signs of Hepatitis B infection                        | <input type="checkbox"/> | <input type="checkbox"/> |

## Awarness of Hepatitis B

| No | Question                                                        | Yes                      | No                       | Do not know              |
|----|-----------------------------------------------------------------|--------------------------|--------------------------|--------------------------|
| 1  | Government provides free HB vaccination for infants in Malaysia | <input type="checkbox"/> | <input type="checkbox"/> | <input type="checkbox"/> |
| 2  | I know the status of my family members Hepatitis B              | <input type="checkbox"/> | <input type="checkbox"/> | <input type="checkbox"/> |
| 3  | I know my status Hepatitis B                                    | <input type="checkbox"/> | <input type="checkbox"/> | <input type="checkbox"/> |
| 4  | I have complete Hepatitis B vaccination                         | <input type="checkbox"/> | <input type="checkbox"/> | <input type="checkbox"/> |

## Data demografis

1. Umur :  Tahun

2. Jantina

- Lelaki
- Perempuan

3. Keturunan

- Malayu
- Cina
- India
- Lain-lain: \_\_\_\_\_

4. Taraf perkahwinan:

- Bujang
- Kahwin
- Bercerai
- Janda/Duda

5. Occupation

- Sektor awam
- Sektor swasta
- Bekerja sendiri
- Pelajar
- Bersara
- Tidak bekerja
- Lain-lain: \_\_\_\_\_

6. Pendidikan

- Tidak pernah ke sekolah
- Sekolah Rendah
- Sekolah Menengah
- Diploma/Sijil
- Sarjana Muda
- Pascasiswazah

7. Berapakah pendapatan bulanan isirumah Anda:  RM

## Pengetahuan terhadap Hepatitis B

| No | Pertanyaan                                                                                    | Benar                    | Salah                    |
|----|-----------------------------------------------------------------------------------------------|--------------------------|--------------------------|
| 1  | Jangkitan Hepatitis B adalah disebabkan oleh virus                                            | <input type="checkbox"/> | <input type="checkbox"/> |
| 2  | Otak boleh terjejas akibat jangkitan Hepatitis B                                              | <input type="checkbox"/> | <input type="checkbox"/> |
| 3  | Hati boleh terjejas akibat jangkitan Hepatitis B                                              | <input type="checkbox"/> | <input type="checkbox"/> |
| 4  | Buah Pinggang boleh terjejas akibat jangkitan Hepatitis B                                     | <input type="checkbox"/> | <input type="checkbox"/> |
| 5  | Hepatitis B boleh berjangkit melalui makanan atau minuman                                     | <input type="checkbox"/> | <input type="checkbox"/> |
| 6  | Hepatitis B boleh berjangkit melalui darah                                                    | <input type="checkbox"/> | <input type="checkbox"/> |
| 7  | Hepatitis B boleh berjangkit melalui tattoo                                                   | <input type="checkbox"/> | <input type="checkbox"/> |
| 8  | Hepatitis B boleh berjangkit melalui hubungan seks                                            | <input type="checkbox"/> | <input type="checkbox"/> |
| 9  | Hepatitis B boleh berjangkit melalui perkongsian jarum suntikan                               | <input type="checkbox"/> | <input type="checkbox"/> |
| 10 | Hepatitis B boleh merebak melalui ibu yang jangkiti Hepatitis B kepada bayi ketika mengandung | <input type="checkbox"/> | <input type="checkbox"/> |
| 11 | Hepatitis B boleh disebarkan melalui berjabat tangan dengan orang yang dijangkiti             | <input type="checkbox"/> | <input type="checkbox"/> |
| 12 | Jangkitan Hepatitis B boleh dicegah dengan vaksin hepatitis B                                 | <input type="checkbox"/> | <input type="checkbox"/> |
| 13 | Jangkitan Hepatitis B boleh dielakkan dengan senaman                                          | <input type="checkbox"/> | <input type="checkbox"/> |
| 14 | Jangkitan Hepatitis B boleh dicegah dengan diet yang seimbang                                 | <input type="checkbox"/> | <input type="checkbox"/> |
| 15 | Jangkitan Hepatitis B boleh dielakkan dengan kebersihan tangan yang baik                      | <input type="checkbox"/> | <input type="checkbox"/> |
| 16 | Terdapat pemeriksaan darah untuk mengesan jangkitan Hepatitis B                               | <input type="checkbox"/> | <input type="checkbox"/> |
| 17 | Terdapat terapi antivirus untuk jangkitan Hepatitis B                                         | <input type="checkbox"/> | <input type="checkbox"/> |
| 18 | Hepatitis B adalah satu faktor risiko untuk kanser hati                                       | <input type="checkbox"/> | <input type="checkbox"/> |
| 19 | Jangkitan Hepatitis B boleh berjangkit kepada pasangan anda                                   | <input type="checkbox"/> | <input type="checkbox"/> |
| 20 | Kerajaan Malaysia menyediakan Hepatitis B vaksin percuma kepada bayi yang baru lahir          | <input type="checkbox"/> | <input type="checkbox"/> |
| 21 | Satu set lengkap vaksin Hepatitis B memerlukan 3 kali suntikan vaksin                         | <input type="checkbox"/> | <input type="checkbox"/> |
| 22 | Jaundis adalah salah satu daripada tanda yang biasa bagi jangkitan Hepatitis B                | <input type="checkbox"/> | <input type="checkbox"/> |

## **Awariness terhadap Hepatitis B**

| No | Pertanyaan                                                            | Ya                       | Tidak                    | Tidak tahu               |
|----|-----------------------------------------------------------------------|--------------------------|--------------------------|--------------------------|
| 1  | Hepatitis B vaksinasi percuma untuk bayi di klinik kesihatan kerajaan | <input type="checkbox"/> | <input type="checkbox"/> | <input type="checkbox"/> |
| 2  | Saya tahu status Hepatitis B ahli keluarga saya                       | <input type="checkbox"/> | <input type="checkbox"/> | <input type="checkbox"/> |
| 3  | Saya tahu status Hepatitis B saya                                     | <input type="checkbox"/> | <input type="checkbox"/> | <input type="checkbox"/> |
| 4  | Saya telah lengkap vaksinasi Hepatitis B                              | <input type="checkbox"/> | <input type="checkbox"/> | <input type="checkbox"/> |
